# Supplementary material
Source: publisher figshare collection journal article supplement (https://acs.figshare.com/ndownloader/files/18739877)
Supplement: Supplementary file 1 [file 18739877]

# Supporting Information

## **Outstanding Synergies in Mechanical Properties of Bioinspired Cellulose Nanofibril Nanocomposites using Self-Crosslinking Polyurethanes**

Francisco Lossada<sup>†,‡,§</sup>, Dejin Jiao<sup>†,‡,§</sup>, Jiaqi Guo<sup>†,‡,§</sup>, Daniel Hoenders<sup>†,‡,§</sup>, Alexander Eckert<sup>†</sup> and  
Andreas Walther<sup>\*,†,‡,§,||,⊥</sup>

<sup>†</sup>A<sup>3</sup>BMS Lab – Active, Adaptive and Autonomous Bioinspired Materials, Institute for Macromolecular Chemistry, University of Freiburg, Stefan-Meier-Str. 31, 79104 Freiburg, Germany

<sup>‡</sup>Freiburg Materials Research Center (FMF), University of Freiburg, Stefan-Meier-Str. 21, 79104 Freiburg, Germany

<sup>§</sup>Freiburg Center for Interactive Materials and Bioinspired Technologies (FIT), University of Freiburg, Georges-Köhler-Allee 105, Freiburg 79110, Germany

<sup>†</sup>DWI–Leibniz-Institute for Interactive Materials, Forckenbeckstrasse 50, Aachen 52056, Germany

<sup>||</sup>Cluster of Excellence livMatS at FIT, University of Freiburg, Georges-Köhler-Allee 105, D-79110 Freiburg, Germany

<sup>⊥</sup>Freiburg Institute for Advanced Studies (FRIAS), University of Freiburg, Albertstr. 19, Freiburg 79104, Germany

---

\* Corresponding Author: [andreas.walther@makro.uni-freiburg.de](mailto:andreas.walther@makro.uni-freiburg.de)

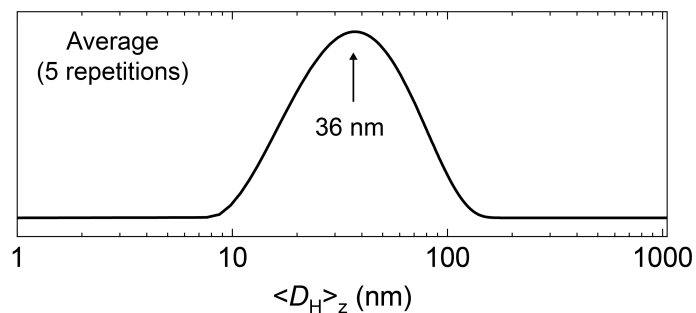

**Figure S1.** Average size of PU particles measured by dynamic light scattering (DLS)

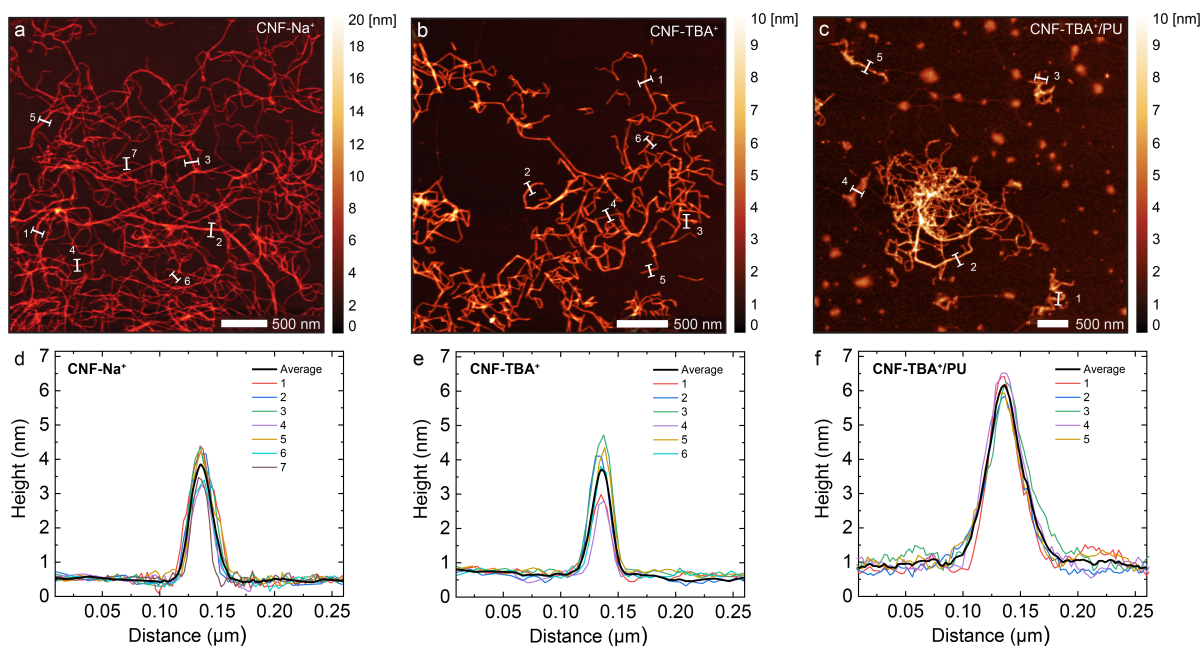

**Figure S2.** Diameter characterization by AFM (a-c) height images and (d-f) height profiles. The height profiles were obtained by selecting at least 5 random fibrils in the height images for (a,d) CNF-Na<sup>+</sup>, (b,e) CNF-TBA<sup>+</sup> and (c,f) CNF-TBA<sup>+</sup>/PU. The latter shows the coating effect of the PU over the CNF-TBA<sup>+</sup>.

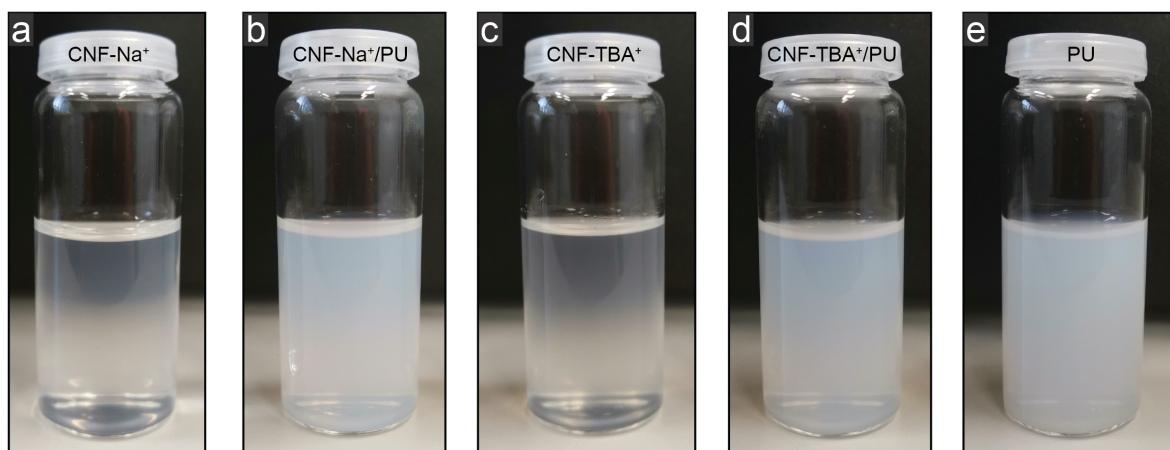

**Figure S3.** Photographs of dispersions (0.25 wt%) without aggregation and phase separation for (a) CNF-Na<sup>+</sup>, (b) CNF-Na<sup>+</sup><sub>50</sub>/PU<sub>50</sub>, (c) CNF-TBA<sup>+</sup>, (d) CNF-TBA<sup>+</sup><sub>50</sub>/PU<sub>50</sub> and (e) PU.

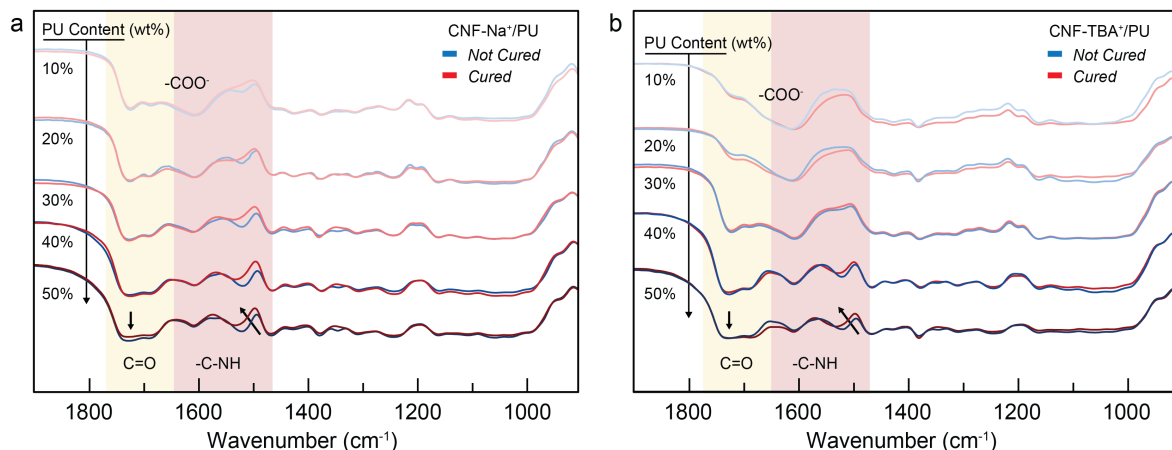

**Figure S4.** FTIR spectra of not cured (blue) and cured (red) nanocomposites for **(a)** CNF-Na<sup>+</sup>/PU and **(b)** CNF-TBA<sup>+</sup>/PU with different PU content (from 10 to 50 wt%). The black small arrows show the curing effect of the PU in the nanocomposite, explained in the main text. Increasing bands for CNF can be observed for lowering the PU content, see main text for explanations.

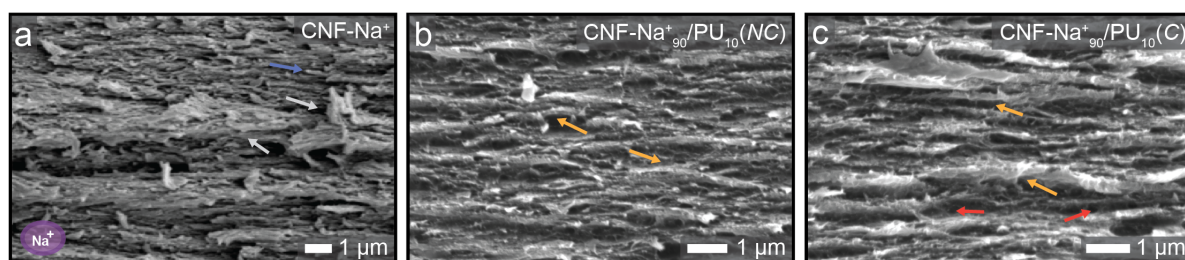

**Figure S5.** SEM of the cross section of fracture samples to illustrate their deformation mechanisms. The transition of their behavior is shown for **(a)** pure CNF-Na<sup>+</sup>, **(b)** CNF-Na<sup>+</sup><sub>90</sub>/PU<sub>10</sub> (NC) and **(c)** CNF-Na<sup>+</sup><sub>90</sub>/PU<sub>10</sub> (C). The grey arrows show bundles and agglomerates of fibrils, the blue arrows show individual fibrils, the orange arrows show pull-out of mesoscale layers and the red arrows show a polymeric phase holding two layers.

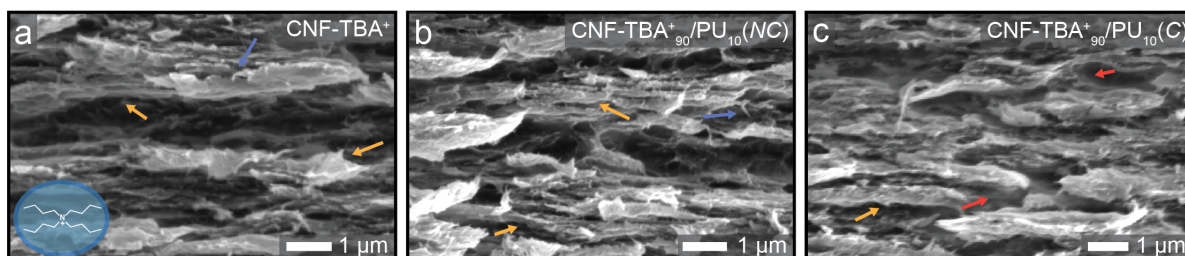

**Figure S6.** SEM of the cross sections of fracture samples to illustrate their deformation mechanisms. The transition of their behavior is shown for **(a)** pure CNF-TBA<sup>+</sup>, **(b)** CNF-TBA<sup>+</sup><sub>90</sub>/PU<sub>10</sub> (NC) and **(c)** CNF-TBA<sup>+</sup><sub>90</sub>/PU<sub>10</sub> (C). The blue arrows show individual fibrils, the orange arrows show pull-out of mesoscale layers and the red arrows show a polymeric phase holding two layers.
